# Supplementary material for: Therapeutic Effect of pHLIP-mediated CEACAM6 Gene Silencing in Lung Adenocarcinoma
Source: PubMed Central journal article supplement (PMC6717735; doi:10.1038/s41598-019-48104-5), 2019-09-02
Supplement: 41598_2019_48104_MOESM1_ESM.pdf [file 41598_2019_48104_MOESM1_ESM.pdf]

## **Therapeutic Effect of pHLIP-mediated CEACAM6 Gene Silencing in Lung Adenocarcinoma**

Seung-Myoung Son<sup>1,2</sup>, Jieun Yun<sup>3</sup>, Sung-Hoon Lee<sup>3</sup>, Hye Sook Han<sup>2,4</sup>, Young Hyun Lim<sup>2</sup>, Chang Gok Woo<sup>1,2</sup>, Ho-Chang Lee<sup>1,2</sup>, Hyung Geun Song<sup>1,2</sup>, Young-Mi Gu<sup>5</sup>, Hyun-Jun Lee<sup>5\*</sup>, Ok-Jun Lee<sup>1,2\*</sup>

<sup>1</sup> Department of Pathology, Chungbuk National University Hospital, 776, 1Sunhwan-ro, Seowon-gu, Cheongju, 28644, Republic of Korea

<sup>2</sup> Chungbuk National University College of Medicine, 1, Chungdae-ro, Seowon-gu, Cheongju, 28644, Republic of Korea

<sup>3</sup> Department of Pharmaceutical Engineering, Cheongju University, 28, Andeokbeol-ro 104beon-gil, Cheongwon-gu, Cheongju, 28503, Republic of Korea

<sup>4</sup> Department of Internal Medicine, Chungbuk National University Hospital, 776, 1Sunhwan-ro, Seowon-gu, Cheongju, 28644, Republic of Korea

<sup>5</sup> Natural Medicine Research Center, Korea Research Institute of Bioscience and Biotechnology, 30, Yeongudanji-ro, Ochang-eup, Cheongwon-gu, Cheongju, Chungbuk 28116, Republic of Korea

## Supplementary Information

### Supplementary Figure 1

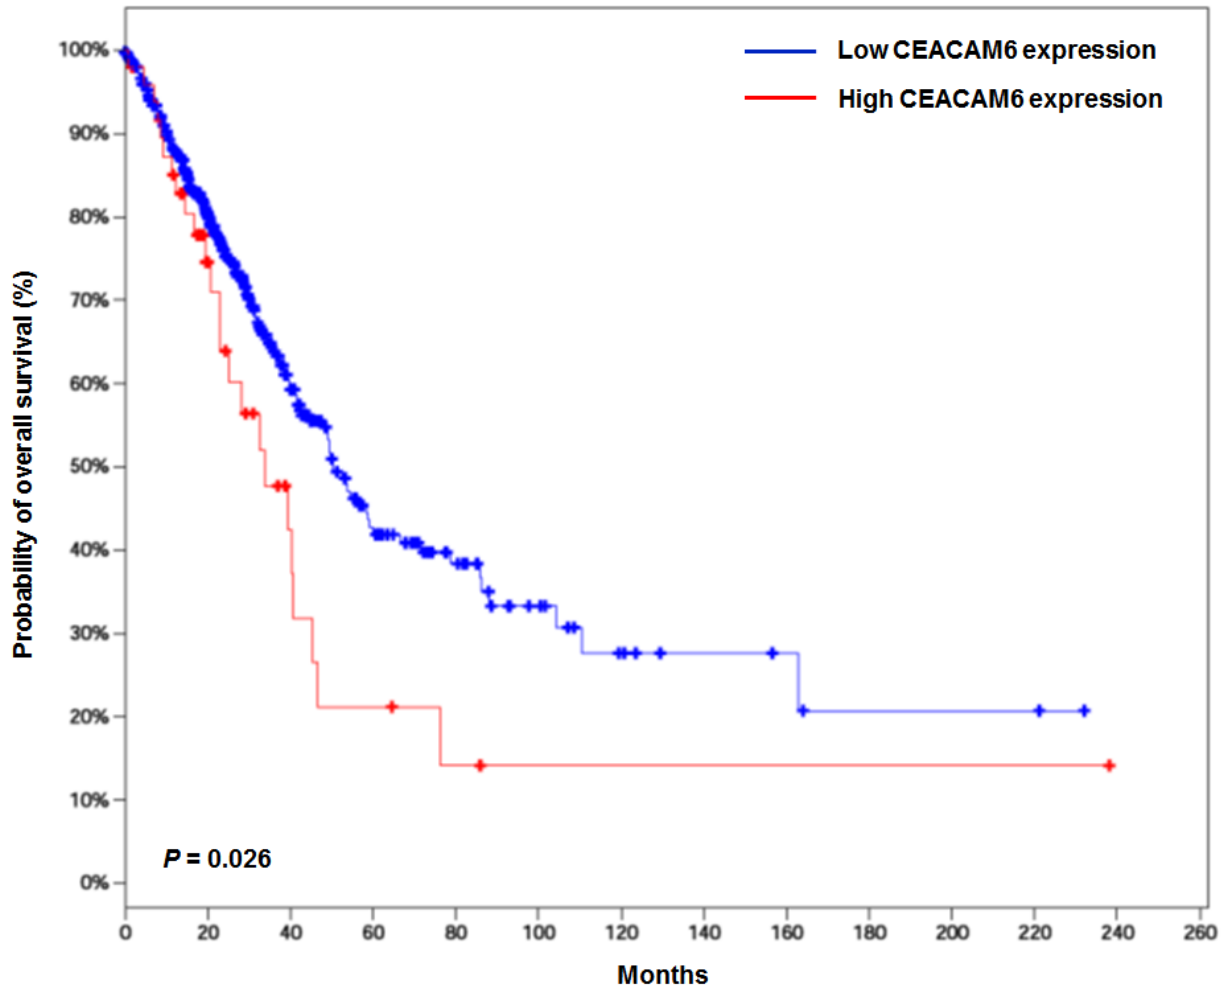

Supplementary Figure 1. Kaplan-Meier survival analysis of CEACAM6 mRNA expression in lung adenocarcinoma.

## Supplementary Figure 2

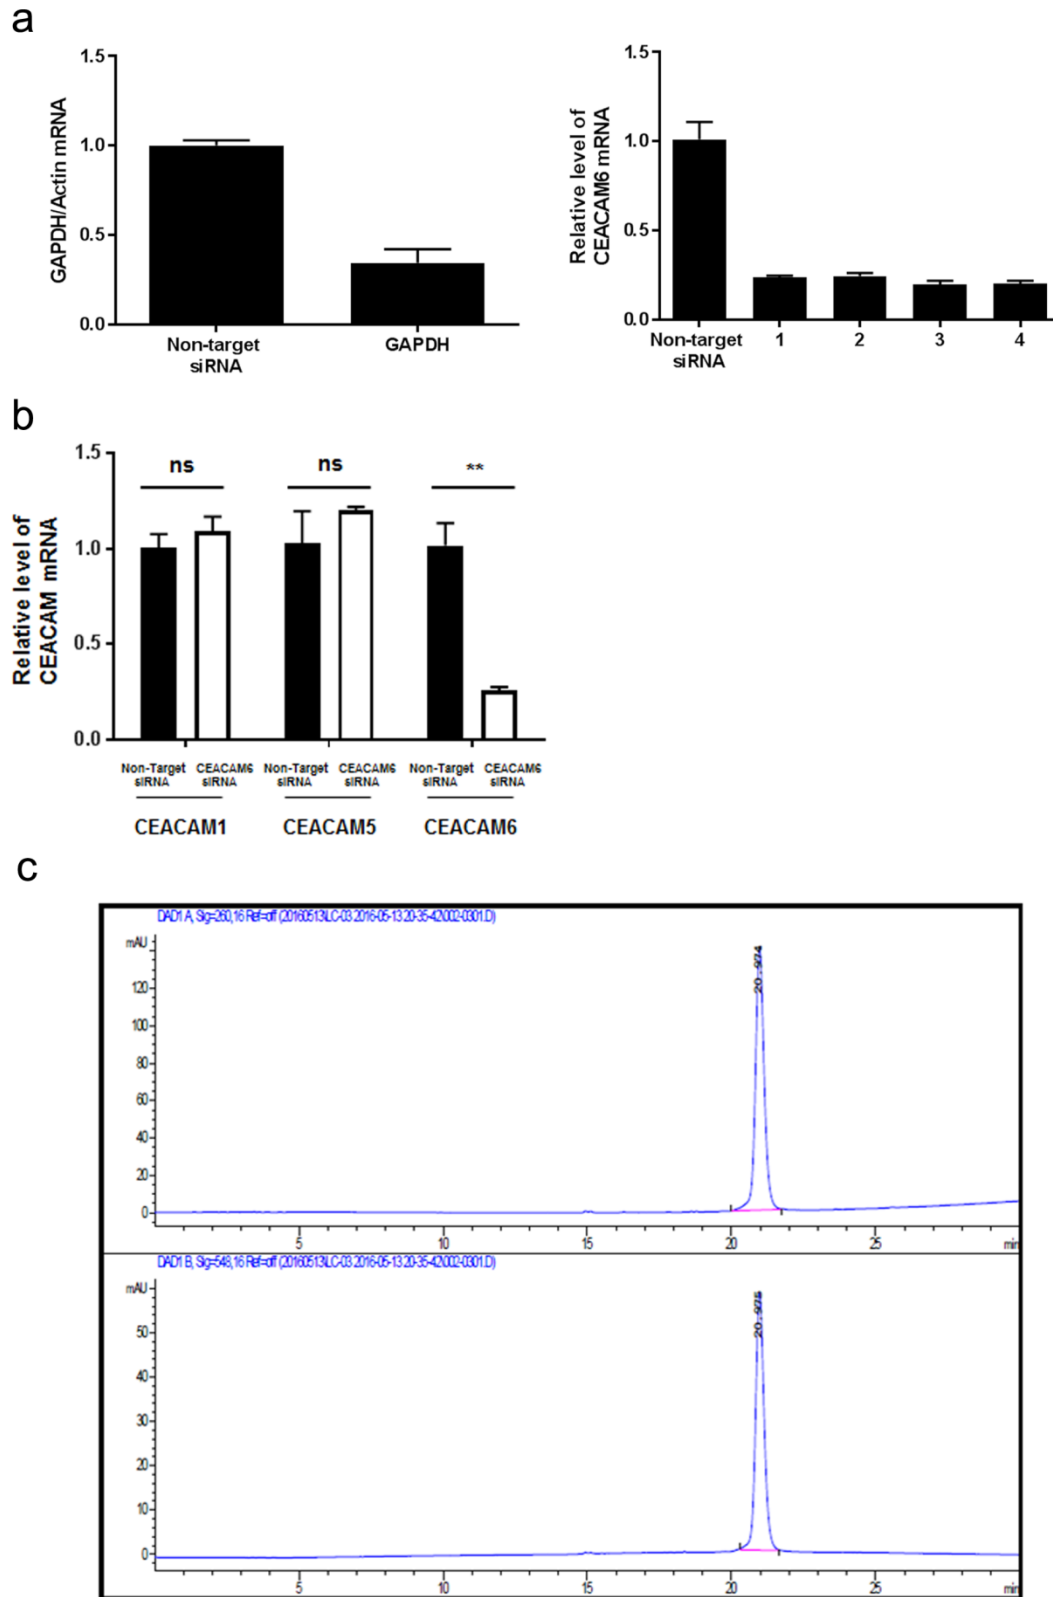

**Supplementary Figure 2. Generation of pHLIP- siCEACAM6**

(a) Quantitative RT-PCR of CEACAM6 mRNA expression in A549 cells transfected with non-target siRNA, GAPDH siRNA, or one of four different siCEACAM6 sequences. (b) Effects of siCEACAM6 on relative mRNA expression of CEACAM1, CEACAM5, and CEACAM6. (c) HPLC elution profiles of a reaction mixture of PNA (siCEACAM6) and pHLIP. Data are shown as mean  $\pm$  s.d.; ns, not significant;  $**P < 0.01$ .

### Supplementary Figure 3

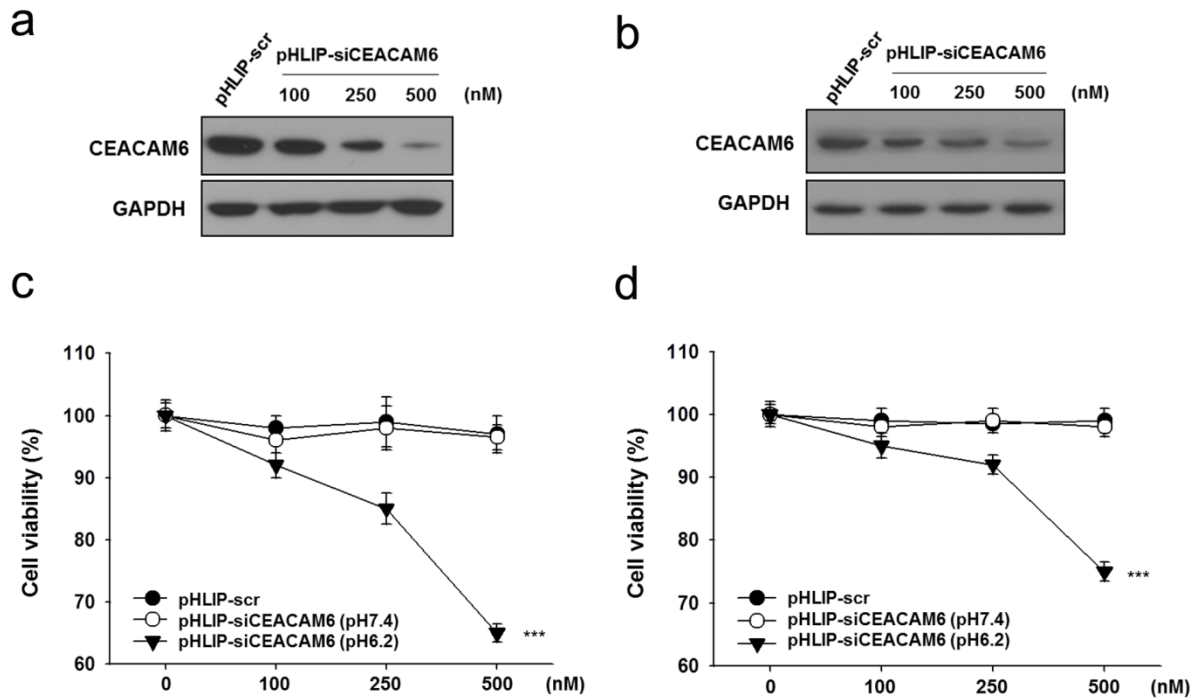

**Supplementary Figure 3. Assessment of the activity of pHLIP- siCEACAM6 in HT-29 and LoVo colon adenocarcinoma cells**

(a, b) Western blotting analysis of CEACAM6 protein levels in HT-29 cells (a) and LoVo cells (b) incubated with pHLIP-siCEACAM6 at pH 6.2. (c, d) Effects of CEACAM6 inhibition on viability of HT-29 cells (c) and LoVo cells (d) at neutral and acidic pH values. Data are shown as mean  $\pm$  s.d.; \*\*\* $P < 0.001$ .

Supplementary Figure 4

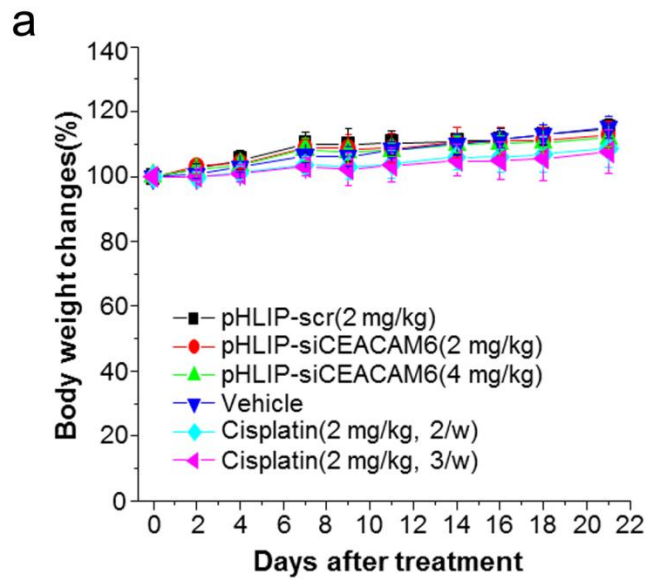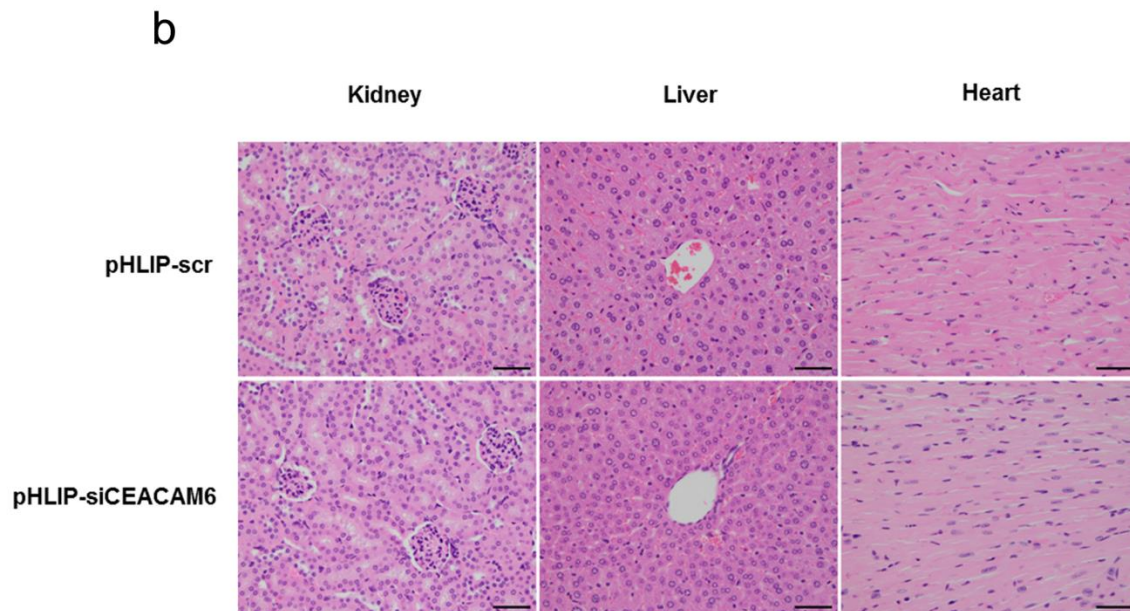

**Supplementary Figure 4 Toxicity assessment of intravenously administered pHLIP-siCEACAM6**

(a) Changes in body weight in experimental mice during the treatment period (n = 5 mice/group). Data are shown as mean  $\pm$  s.d. (b) Representative histological analyses of the kidney, liver, and heart (original magnification  $\times$  400, scale bar = 50  $\mu$ m) harvested from mice. All sections reveal an absence of microscopic changes associated with toxicity in pHLIP-siCEACAM6-treated animals (compare with normal sections in pHLIP-scr control).

Supplementary Figure 5

a

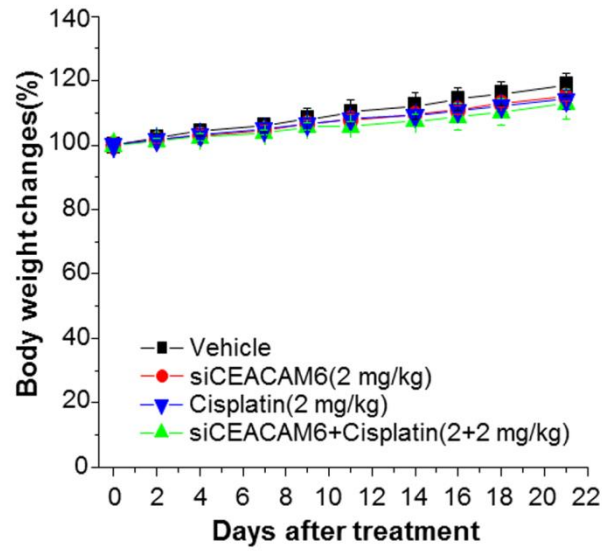

b

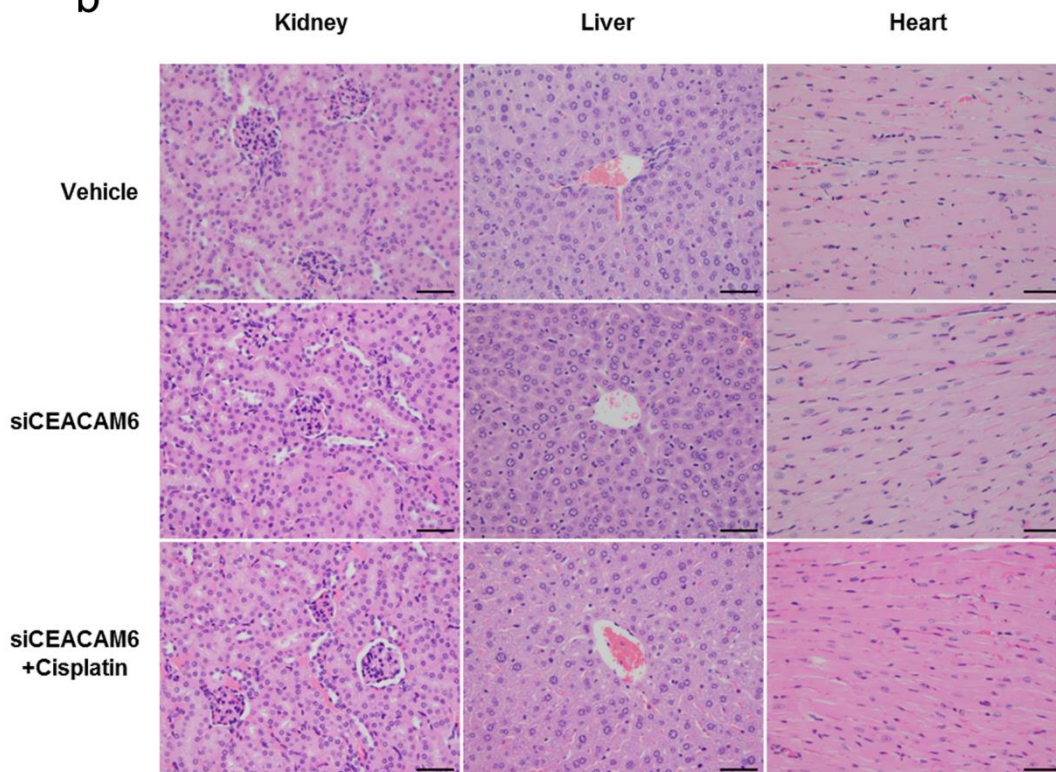



**Supplementary Figure 5 Toxicity assessment of combination treatment with pHLIP-siCEACAM6 and cisplatin**

(a) Changes in body weight in experimental mice during the treatment period (n = 5 mice/group). Data are shown as mean  $\pm$  s.d. (b) Representative histological analysis of the kidney, liver, and heart (original magnification  $\times$  400, scale bar = 50  $\mu$ m) harvested from mice. All sections reveal an absence of microscopic changes associated with toxicity in pHLIP-siCEACAM6-treated and pHLIP-siCEACAM6+cisplatin-treated animals (compare with normal sections in pHLIP-scr control).
